# Supplementary material for: A bio-inspired sensor based on surfactant film and Pd nanoparticles
Source: Royal Society of Chemistry journal article supplement (doi:10.1039/c2an36264c), 2012-11-05
Supplement: c2an36264c.pdf [file c2an36264c.pdf]

## **Electronic Supplementary Information**

### **Bio-inspired sensor based on surfactant film and Pd nanoparticles**

Eduardo Zapp<sup>a</sup>, Franciane D. Souza<sup>b</sup>, Bruno S. Souza<sup>b</sup>, Faruk Nome<sup>b</sup>, Ademir Neves<sup>c</sup>, Iolanda C. Vieira<sup>a,\*</sup>

<sup>a</sup>*Laboratory of Biosensors, Department of Chemistry, Federal University of Santa Catarina, 88040-900, Florianópolis, SC, Brazil.*

<sup>b</sup>*Catalysis and Interfacial Phenomena Laboratory, Department of Chemistry, Federal University of Santa Catarina, 88040-900, Florianópolis, SC, Brazil.*

<sup>c</sup>*Laboratory of Bioinorganic and Crystallography, Department of Chemistry, Federal University of Santa Catarina, 88040-900, Florianópolis, SC, Brazil.*

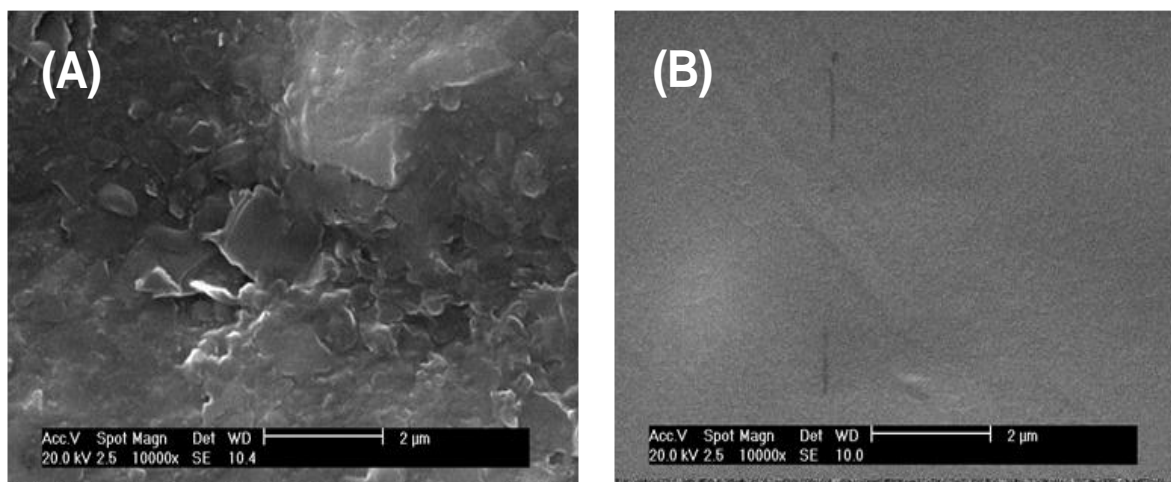

**Fig. S1.** SEM micrograph of (A) bare GCE (B) and GCE coated with Pd/ImS3-14 observed at 10 kV with magnification of 10K.

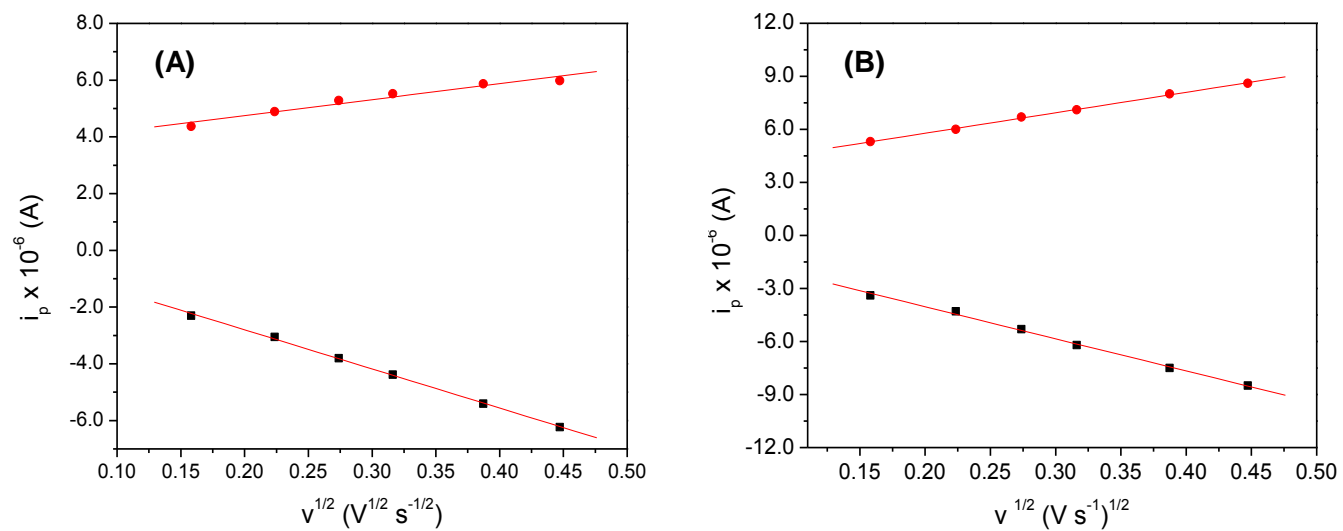

**Fig. S2.** Randles-Sevcik plot of (A) HQ and (B) CC, for Pd/ImS3-14/(Fe<sup>III</sup>Cu<sup>II</sup>)/GCE with a scan rate in range of 25–200 mV s<sup>-1</sup>.

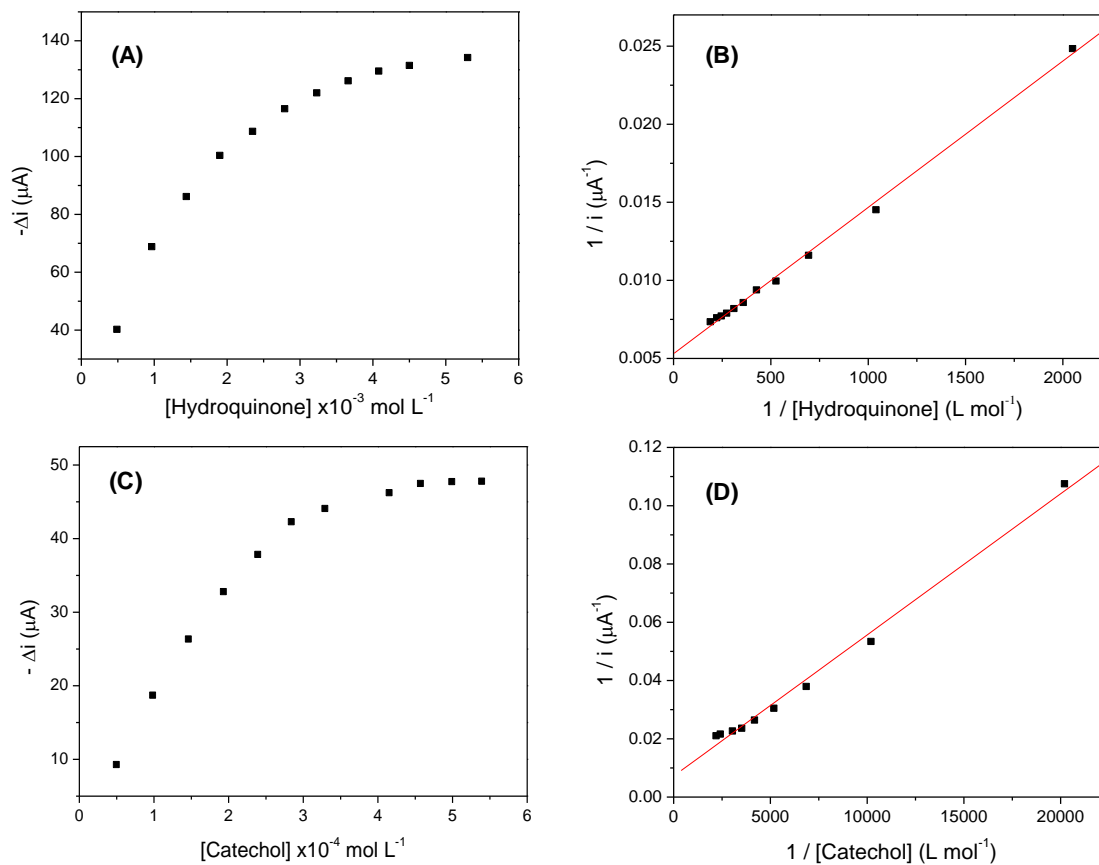

**Fig. S3.** Kinetic activity of complex as catecholoxidase and Lineweaver-Burk plot using solutions of HQ (A and B) and CC (C and D) in phosphate buffer (0.1 mol L<sup>-1</sup>, pH 7.0).

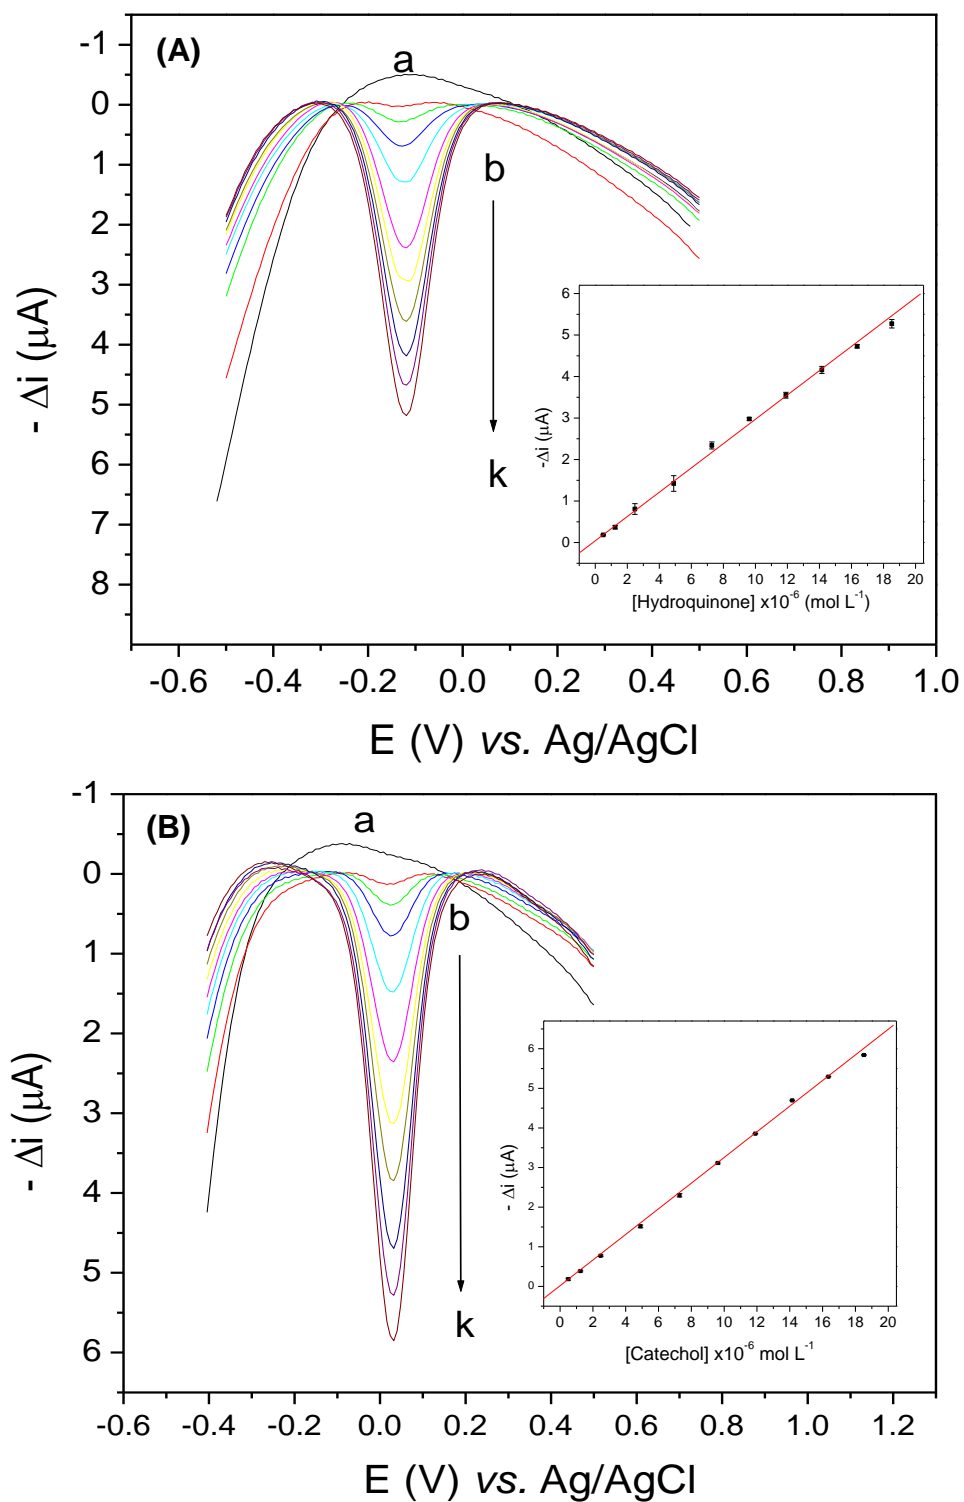

**Fig. S4.** Square-wave voltammograms obtained using the Pd/ImS3-14/(Fe<sup>III</sup>Cu<sup>II</sup>)/GCE sensor in (a) phosphate buffer solution only (0.1 mol L<sup>-1</sup>, pH 7.0) and in solutions containing diphenol in the range of 4.99x10<sup>-7</sup> to 1.85x10<sup>-5</sup> mol L<sup>-1</sup> (curves b-k). The insert shows the calibration curve. (A) HQ; (B) CC.

**Table S1.** CC and HQ recovery in cigarette filter extracts using the proposed sensor

| Sample | CC ( $\times 10^{-6}$ mol L $^{-1}$ ) |                    |                           | HQ ( $\times 10^{-6}$ mol L $^{-1}$ ) |                    |                           |
|--------|---------------------------------------|--------------------|---------------------------|---------------------------------------|--------------------|---------------------------|
|        | Added                                 | Found <sup>a</sup> | Recovery (%) <sup>b</sup> | Added                                 | Found <sup>a</sup> | Recovery (%) <sup>b</sup> |
| A      | 1.87                                  | 1.78 $\pm$ 0.17    | 98.20 $\pm$ 3.74          | 1.87                                  | 1.72 $\pm$ 0.10    | 91.67 $\pm$ 5.40          |
|        | 3.70                                  | 3.92 $\pm$ 0.13    | 105.90 $\pm$ 3.53         | 3.70                                  | 4.09 $\pm$ 0.15    | 99.42 $\pm$ 4.09          |
|        | 5.50                                  | 5.41 $\pm$ 0.03    | 98.40 $\pm$ 0.51          | 5.50                                  | 5.80 $\pm$ 0.04    | 105.55 $\pm$ 3.17         |
| B      | 1.87                                  | 1.97 $\pm$ 0.04    | 105.30 $\pm$ 1.91         | 1.87                                  | 1.79 $\pm$ 0.04    | 95.70 $\pm$ 2.02          |
|        | 3.70                                  | 3.88 $\pm$ 0.12    | 104.80 $\pm$ 3.34         | 3.70                                  | 3.60 $\pm$ 0.05    | 97.30 $\pm$ 1.29          |
|        | 5.50                                  | 5.48 $\pm$ 0.05    | 99.60 $\pm$ 0.84          | 5.50                                  | 5.49 $\pm$ 0.05    | 99.80 $\pm$ 0.96          |
| C      | 1.87                                  | 1.91 $\pm$ 0.01    | 102.10 $\pm$ 1.91         | 1.87                                  | 1.93 $\pm$ 0.07    | 103.20 $\pm$ 3.50         |
|        | 3.70                                  | 3.83 $\pm$ 0.06    | 103.50 $\pm$ 3.83         | 3.70                                  | 3.73 $\pm$ 0.21    | 100.80 $\pm$ 0.96         |
|        | 5.50                                  | 5.31 $\pm$ 0.11    | 96.60 $\pm$ 5.31          | 5.50                                  | 5.56 $\pm$ 0.11    | 101.10 $\pm$ 2.08         |

<sup>a</sup>Mean  $\pm$  standard deviation; n=3.

<sup>b</sup>Recovery = (mean found value / added value)  $\times$  100%.
